# Supplementary material for: Exploring the fate of the tris(pentafluorophenyl)borane radical anion in weakly coordinating solvents
Source: Royal Society of Chemistry journal article supplement (doi:10.1039/c2dt31622f), 2012-11-22
Supplement: c2dt31622f.pdf [file c2dt31622f.pdf]

# Exploring the fate of the tris(pentafluorophenyl)borane radical anion in weakly coordinating solvents

Elliot J. Lawrence<sup>a</sup>, Vasily S. Oganessian,<sup>a</sup> Gregory G. Wildgoose<sup>\*a</sup> and Andrew E. Ashley<sup>b</sup>

<sup>a</sup> Energy & Materials Laboratory, School of Chemistry, University of East Anglia, Norwich, NR4 7TJ, United Kingdom.

E-mail: G.Wildgoose@uea.ac.uk

<sup>b</sup> Department of Chemistry, Imperial College London, South Kensington, London SW7 2AZ, United Kingdom.

## Supporting Information

### Cyclic Voltammetry

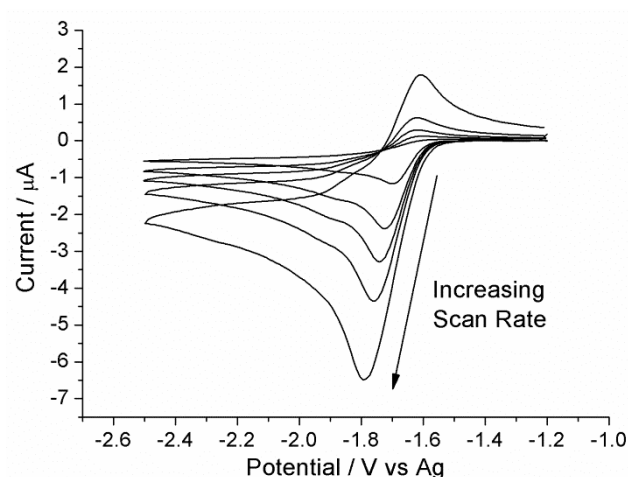

SI 1 Overlaid cyclic voltammograms of B(C<sub>6</sub>F<sub>5</sub>)<sub>3</sub> in CH<sub>2</sub>Cl<sub>2</sub> (5 mM, 0.05 M [<sup>n</sup>Bu<sub>4</sub>N][B(C<sub>6</sub>F<sub>5</sub>)<sub>4</sub>]) recorded at scan rates of 50-5000 mV s<sup>-1</sup> at a Pt macrodisk working electrode and ambient temperature.

### Chronoamperometry

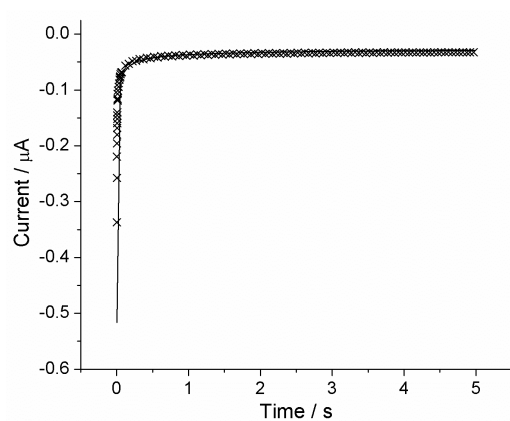

SI 2 Experimental chronoamperogram (crosses) and Shoup-Szabo best fit (solid line) for the reduction of B(C<sub>6</sub>F<sub>5</sub>)<sub>3</sub> in DFB (5 mM, 0.05 M [<sup>n</sup>Bu<sub>4</sub>N][B(C<sub>6</sub>F<sub>5</sub>)<sub>4</sub>]) at a 30 μm radius Pt microdisk.

## Linear Sweep Voltammetry

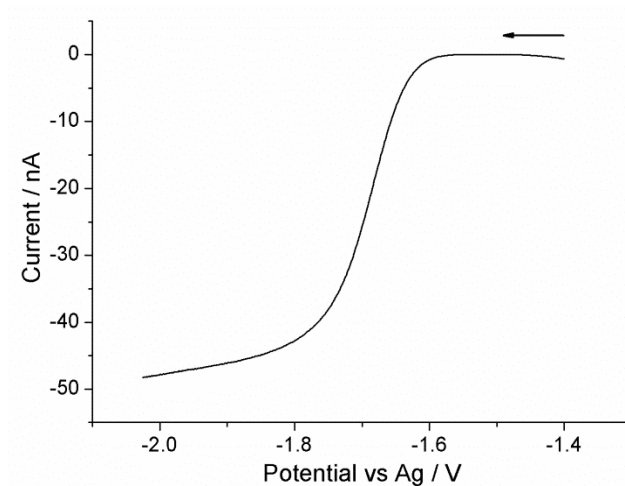

**SI 3** Linear sweep voltammogram for the one-electron reduction of  $\text{B}(\text{C}_6\text{F}_5)_3$  in  $\text{CH}_2\text{Cl}_2$  (4.8 mM, 0.05 M  $[\text{nBu}_4\text{N}][\text{B}(\text{C}_6\text{F}_5)_4]$ ) recorded at a scan rate of  $5 \text{ mV s}^{-1}$  at a  $31 \text{ }\mu\text{m}$  Pt microdisk working electrode.

## DFT calculations

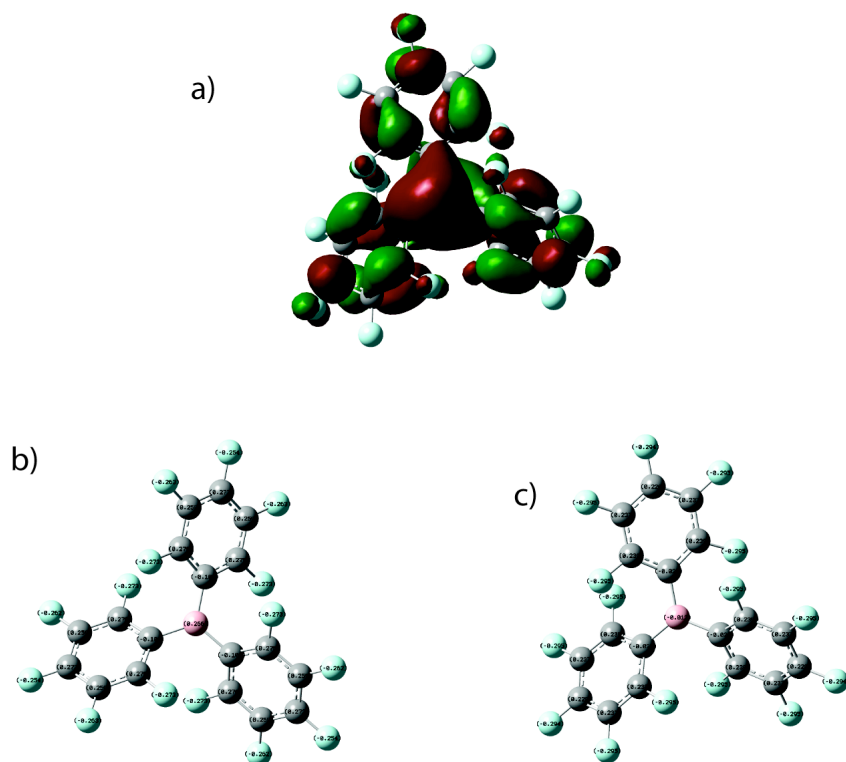

**SI 4** DFT calculations using the spin-unrestricted B3LYP 6-311+G(d,p) basis set for: **a)** the SOMO of the  $\text{B}(\text{C}_6\text{F}_5)_3\bullet^-$  radical anion; Charge density distribution based on Mulliken electron population analysis for **b)**  $\text{B}(\text{C}_6\text{F}_5)_3$  and **c)**  $\text{B}(\text{C}_6\text{F}_5)_3\bullet^-$  radical anion.
